# Supplementary material
Source: PubMed Central journal article supplement (PMC3936310)
Supplement: NIHMS521715-supplement-Supp_Table_S1___Fig_S1-S2.pdf [file NIHMS521715-supplement-Supp_Table_S1___Fig_S1-S2.pdf]

Table S1. Interface prediction precision comparison between top-ranked ZDOCK and RCF

| Complex PDB | Ligand or Receptor | Total Predictions <sup>a</sup> | ZDOCK1 TP <sup>b</sup> | RCF TP <sup>b</sup> | ZDOCK1 Precision | RCF Precision | ZDOCK performance <sup>c</sup> |
|-------------|--------------------|--------------------------------|------------------------|---------------------|------------------|---------------|--------------------------------|
| 1A2K        | L                  | 26                             | 14                     | 15                  | 0.54             | 0.58          | Others                         |
| 1A2K        | R                  | 28                             | 0                      | 4                   | 0.00             | 0.14          | Others                         |
| 1ACB        | L                  | 31                             | 10                     | 13                  | 0.32             | 0.42          | ZDOCK no hit 2000              |
| 1ACB        | R                  | 52                             | 19                     | 20                  | 0.37             | 0.38          | ZDOCK no hit 2000              |
| 1AK4        | L                  | 21                             | 5                      | 5                   | 0.24             | 0.24          | ZDOCK no hit 2000              |
| 1AK4        | R                  | 37                             | 17                     | 15                  | 0.46             | 0.41          | ZDOCK no hit 2000              |
| 1AKJ        | L                  | 34                             | 0                      | 2                   | 0.00             | 0.06          | Others                         |
| 1AKJ        | R                  | 32                             | 1                      | 0                   | 0.03             | 0.00          | Others                         |
| 1ATN        | L                  | 50                             | 0                      | 4                   | 0.00             | 0.08          | ZDOCK no hit 2000              |
| 1ATN        | R                  | 39                             | 0                      | 5                   | 0.00             | 0.13          | ZDOCK no hit 2000              |
| 1AVX        | L                  | 23                             | 17                     | 11                  | 0.74             | 0.48          | Others                         |
| 1AVX        | R                  | 31                             | 23                     | 21                  | 0.74             | 0.68          | Others                         |
| 1AY7        | L                  | 22                             | 15                     | 13                  | 0.68             | 0.59          | Others                         |
| 1AY7        | R                  | 21                             | 14                     | 10                  | 0.67             | 0.48          | Others                         |
| 1AZS        | L                  | 34                             | 16                     | 17                  | 0.47             | 0.50          | Others                         |
| 1AZS        | R                  | 54                             | 2                      | 8                   | 0.04             | 0.15          | Others                         |
| 1B6C        | L                  | 32                             | 0                      | 7                   | 0.00             | 0.22          | Others                         |
| 1B6C        | R                  | 33                             | 21                     | 22                  | 0.64             | 0.67          | Others                         |
| 1BKD        | L                  | 36                             | 4                      | 22                  | 0.11             | 0.61          | ZDOCK no hit 2000              |
| 1BKD        | R                  | 49                             | 38                     | 6                   | 0.78             | 0.12          | ZDOCK no hit 2000              |
| 1BUH        | L                  | 36                             | 13                     | 19                  | 0.36             | 0.53          | Others                         |
| 1BUH        | R                  | 35                             | 0                      | 12                  | 0.00             | 0.34          | Others                         |
| 1BVN        | L                  | 37                             | 27                     | 26                  | 0.73             | 0.70          | ZDOCK 1st hit                  |
| 1BVN        | R                  | 63                             | 32                     | 28                  | 0.51             | 0.44          | ZDOCK 1st hit                  |
| 1CGI        | L                  | 25                             | 20                     | 19                  | 0.80             | 0.76          | Others                         |
| 1CGI        | R                  | 30                             | 15                     | 22                  | 0.50             | 0.73          | Others                         |
| 1CLV        | L                  | 26                             | 23                     | 22                  | 0.88             | 0.85          | ZDOCK 1st hit                  |
| 1CLV        | R                  | 55                             | 38                     | 26                  | 0.69             | 0.47          | ZDOCK 1st hit                  |
| 1D6R        | L                  | 29                             | 4                      | 9                   | 0.14             | 0.31          | ZDOCK no hit 2000              |
| 1D6R        | R                  | 40                             | 12                     | 18                  | 0.30             | 0.45          | ZDOCK no hit 2000              |
| 1DE4        | L                  | 39                             | 19                     | 10                  | 0.49             | 0.26          | ZDOCK no hit 2000              |
| 1DE4        | R                  | 44                             | 3                      | 21                  | 0.07             | 0.48          | ZDOCK no hit 2000              |
| 1DFJ        | L                  | 63                             | 38                     | 28                  | 0.60             | 0.44          | ZDOCK 1st hit                  |
| 1DFJ        | R                  | 52                             | 37                     | 30                  | 0.71             | 0.58          | ZDOCK 1st hit                  |
| 1E6E        | L                  | 24                             | 14                     | 18                  | 0.58             | 0.75          | Others                         |
| 1E96        | L                  | 41                             | 0                      | 13                  | 0.00             | 0.32          | Others                         |

|      |   |    |    |    |      |      |                   |
|------|---|----|----|----|------|------|-------------------|
| 1E96 | R | 46 | 13 | 15 | 0.28 | 0.33 | Others            |
| 1EAW | L | 33 | 21 | 21 | 0.64 | 0.64 | Others            |
| 1EAW | R | 48 | 27 | 28 | 0.56 | 0.58 | Others            |
| 1EER | L | 44 | 34 | 28 | 0.77 | 0.64 | ZDOCK no hit 2000 |
| 1EER | R | 41 | 18 | 20 | 0.44 | 0.49 | ZDOCK no hit 2000 |
| 1EFN | L | 14 | 11 | 10 | 0.79 | 0.71 | Others            |
| 1EFN | R | 18 | 2  | 3  | 0.11 | 0.17 | Others            |
| 1EWY | L | 36 | 20 | 20 | 0.56 | 0.56 | Others            |
| 1EZU | L | 52 | 24 | 20 | 0.46 | 0.38 | Others            |
| 1EZU | R | 65 | 20 | 24 | 0.31 | 0.37 | Others            |
| 1F34 | L | 41 | 0  | 27 | 0.00 | 0.66 | Others            |
| 1F34 | R | 43 | 2  | 13 | 0.05 | 0.30 | Others            |
| 1F51 | L | 28 | 23 | 20 | 0.82 | 0.71 | ZDOCK 1st hit     |
| 1F51 | R | 38 | 0  | 5  | 0.00 | 0.13 | ZDOCK 1st hit     |
| 1F6M | L | 48 | 25 | 28 | 0.52 | 0.58 | ZDOCK no hit 2000 |
| 1F6M | R | 57 | 5  | 8  | 0.09 | 0.14 | ZDOCK no hit 2000 |
| 1FAK | L | 26 | 12 | 13 | 0.46 | 0.50 | ZDOCK no hit 2000 |
| 1FAK | R | 30 | 7  | 17 | 0.23 | 0.57 | ZDOCK no hit 2000 |
| 1FC2 | L | 62 | 0  | 3  | 0.00 | 0.05 | ZDOCK no hit 2000 |
| 1FC2 | R | 44 | 10 | 12 | 0.23 | 0.27 | ZDOCK no hit 2000 |
| 1FCC | L | 42 | 13 | 14 | 0.31 | 0.33 | ZDOCK no hit 2000 |
| 1FCC | R | 56 | 0  | 4  | 0.00 | 0.07 | ZDOCK no hit 2000 |
| 1FFW | L | 19 | 12 | 13 | 0.63 | 0.68 | Others            |
| 1FFW | R | 21 | 15 | 7  | 0.71 | 0.33 | Others            |
| 1FLE | L | 32 | 20 | 19 | 0.63 | 0.59 | Others            |
| 1FLE | R | 33 | 0  | 4  | 0.00 | 0.12 | Others            |
| 1FQ1 | L | 26 | 6  | 9  | 0.23 | 0.35 | ZDOCK no hit 2000 |
| 1FQ1 | R | 33 | 0  | 6  | 0.00 | 0.18 | ZDOCK no hit 2000 |
| 1FQJ | L | 31 | 2  | 8  | 0.06 | 0.26 | ZDOCK no hit 2000 |
| 1FQJ | R | 34 | 5  | 3  | 0.15 | 0.09 | ZDOCK no hit 2000 |
| 1GCQ | L | 46 | 14 | 13 | 0.30 | 0.28 | Others            |
| 1GCQ | R | 62 | 7  | 11 | 0.11 | 0.18 | Others            |
| 1GHQ | L | 27 | 0  | 1  | 0.00 | 0.04 | ZDOCK no hit 2000 |
| 1GHQ | R | 40 | 0  | 0  | 0.00 | 0.00 | ZDOCK no hit 2000 |
| 1GL1 | L | 26 | 20 | 17 | 0.77 | 0.65 | Others            |
| 1GL1 | R | 46 | 28 | 22 | 0.61 | 0.48 | Others            |
| 1GLA | L | 43 | 0  | 18 | 0.00 | 0.42 | ZDOCK no hit 2000 |
| 1GLA | R | 37 | 0  | 2  | 0.00 | 0.05 | ZDOCK no hit 2000 |
| 1GP2 | L | 37 | 22 | 23 | 0.59 | 0.62 | ZDOCK no hit 2000 |

|      |   |    |    |    |      |      |                   |
|------|---|----|----|----|------|------|-------------------|
| 1GP2 | R | 34 | 1  | 6  | 0.03 | 0.18 | ZDOCK no hit 2000 |
| 1GPW | L | 23 | 23 | 22 | 1.00 | 0.96 | Others            |
| 1GPW | R | 32 | 29 | 15 | 0.91 | 0.47 | Others            |
| 1GRN | L | 48 | 18 | 12 | 0.38 | 0.25 | Others            |
| 1GRN | R | 41 | 24 | 17 | 0.59 | 0.41 | Others            |
| 1GXD | L | 45 | 9  | 22 | 0.20 | 0.49 | Others            |
| 1GXD | R | 56 | 0  | 4  | 0.00 | 0.07 | Others            |
| 1H1V | L | 49 | 4  | 1  | 0.08 | 0.02 | ZDOCK no hit 2000 |
| 1H1V | R | 58 | 4  | 14 | 0.07 | 0.24 | ZDOCK no hit 2000 |
| 1H9D | L | 50 | 21 | 19 | 0.42 | 0.38 | Others            |
| 1H9D | R | 47 | 22 | 23 | 0.47 | 0.49 | Others            |
| 1HCF | L | 29 | 8  | 12 | 0.28 | 0.41 | Others            |
| 1HCF | R | 44 | 0  | 10 | 0.00 | 0.23 | Others            |
| 1HE1 | L | 24 | 12 | 16 | 0.50 | 0.67 | Others            |
| 1HE1 | R | 20 | 5  | 8  | 0.25 | 0.40 | Others            |
| 1HE8 | L | 43 | 9  | 14 | 0.21 | 0.33 | ZDOCK no hit 2000 |
| 1HE8 | R | 44 | 0  | 0  | 0.00 | 0.00 | ZDOCK no hit 2000 |
| 1HIA | L | 25 | 16 | 16 | 0.64 | 0.64 | ZDOCK no hit 2000 |
| 1HIA | R | 33 | 7  | 7  | 0.21 | 0.21 | ZDOCK no hit 2000 |
| 1I2M | L | 40 | 26 | 24 | 0.65 | 0.60 | Others            |
| 1I2M | R | 32 | 18 | 18 | 0.56 | 0.56 | Others            |
| 1I4D | L | 25 | 17 | 17 | 0.68 | 0.68 | Others            |
| 1I4D | R | 31 | 1  | 7  | 0.03 | 0.23 | Others            |
| 1IB1 | L | 80 | 17 | 20 | 0.21 | 0.25 | ZDOCK no hit 2000 |
| 1IB1 | R | 82 | 25 | 23 | 0.30 | 0.28 | ZDOCK no hit 2000 |
| 1IBR | L | 34 | 0  | 2  | 0.00 | 0.06 | ZDOCK no hit 2000 |
| 1IBR | R | 35 | 8  | 9  | 0.23 | 0.26 | ZDOCK no hit 2000 |
| 1IJK | L | 38 | 20 | 7  | 0.53 | 0.18 | Others            |
| 1IJK | R | 41 | 19 | 17 | 0.46 | 0.41 | Others            |
| 1IRA | L | 35 | 24 | 21 | 0.69 | 0.60 | ZDOCK no hit 2000 |
| 1IRA | R | 38 | 0  | 13 | 0.00 | 0.34 | ZDOCK no hit 2000 |
| 1J2J | L | 23 | 10 | 11 | 0.43 | 0.48 | Others            |
| 1J2J | R | 31 | 12 | 11 | 0.39 | 0.35 | Others            |
| 1JIW | L | 21 | 10 | 9  | 0.48 | 0.43 | ZDOCK no hit 2000 |
| 1JIW | R | 23 | 1  | 10 | 0.04 | 0.43 | ZDOCK no hit 2000 |
| 1JK9 | L | 32 | 16 | 21 | 0.50 | 0.66 | ZDOCK no hit 2000 |
| 1JK9 | R | 38 | 14 | 7  | 0.37 | 0.18 | ZDOCK no hit 2000 |
| 1JMO | L | 26 | 5  | 12 | 0.19 | 0.46 | ZDOCK no hit 2000 |
| 1JMO | R | 41 | 8  | 8  | 0.20 | 0.20 | ZDOCK no hit 2000 |

|      |   |    |    |    |      |      |                   |
|------|---|----|----|----|------|------|-------------------|
| 1JTG | R | 57 | 40 | 24 | 0.70 | 0.42 | ZDOCK 1st hit     |
| 1JWH | L | 35 | 25 | 4  | 0.71 | 0.11 | ZDOCK 1st hit     |
| 1JWH | R | 30 | 17 | 12 | 0.57 | 0.40 | ZDOCK 1st hit     |
| 1JZD | L | 36 | 19 | 17 | 0.53 | 0.47 | ZDOCK no hit 2000 |
| 1JZD | R | 39 | 8  | 7  | 0.21 | 0.18 | ZDOCK no hit 2000 |
| 1K5D | L | 68 | 8  | 16 | 0.12 | 0.24 | Others            |
| 1K5D | R | 43 | 1  | 14 | 0.02 | 0.33 | Others            |
| 1K74 | L | 46 | 28 | 5  | 0.61 | 0.11 | ZDOCK 1st hit     |
| 1K74 | R | 44 | 27 | 11 | 0.61 | 0.25 | ZDOCK 1st hit     |
| 1KAC | L | 32 | 20 | 17 | 0.63 | 0.53 | Others            |
| 1KAC | R | 39 | 0  | 8  | 0.00 | 0.21 | Others            |
| 1KKL | L | 28 | 14 | 21 | 0.50 | 0.75 | ZDOCK no hit 2000 |
| 1KKL | R | 41 | 0  | 1  | 0.00 | 0.02 | ZDOCK no hit 2000 |
| 1KLU | L | 36 | 0  | 6  | 0.00 | 0.17 | Others            |
| 1KLU | R | 34 | 10 | 3  | 0.29 | 0.09 | Others            |
| 1KTZ | L | 30 | 1  | 9  | 0.03 | 0.30 | Others            |
| 1KTZ | R | 29 | 2  | 5  | 0.07 | 0.17 | Others            |
| 1KXP | L | 67 | 45 | 44 | 0.67 | 0.66 | ZDOCK 1st hit     |
| 1KXP | R | 61 | 35 | 26 | 0.57 | 0.43 | ZDOCK 1st hit     |
| 1LFD | L | 26 | 0  | 8  | 0.00 | 0.31 | Others            |
| 1LFD | R | 23 | 9  | 12 | 0.39 | 0.52 | Others            |
| 1M10 | L | 31 | 0  | 2  | 0.00 | 0.06 | ZDOCK no hit 2000 |
| 1M10 | R | 30 | 20 | 15 | 0.67 | 0.50 | ZDOCK no hit 2000 |
| 1MAH | L | 25 | 21 | 17 | 0.84 | 0.68 | ZDOCK 1st hit     |
| 1MAH | R | 43 | 31 | 23 | 0.72 | 0.53 | ZDOCK 1st hit     |
| 1ML0 | L | 35 | 27 | 22 | 0.77 | 0.63 | Others            |
| 1MQ8 | L | 20 | 0  | 9  | 0.00 | 0.45 | ZDOCK no hit 2000 |
| 1MQ8 | R | 12 | 0  | 0  | 0.00 | 0.00 | ZDOCK no hit 2000 |
| 1N2C | L | 37 | 0  | 15 | 0.00 | 0.41 | ZDOCK no hit 2000 |
| 1N80 | L | 27 | 19 | 10 | 0.70 | 0.37 | ZDOCK 1st hit     |
| 1N80 | R | 42 | 12 | 12 | 0.29 | 0.29 | ZDOCK 1st hit     |
| 1NW9 | L | 33 | 4  | 7  | 0.12 | 0.21 | ZDOCK no hit 2000 |
| 1NW9 | R | 41 | 15 | 16 | 0.37 | 0.39 | ZDOCK no hit 2000 |
| 1OC0 | L | 18 | 10 | 11 | 0.56 | 0.61 | ZDOCK no hit 2000 |
| 1OC0 | R | 31 | 10 | 12 | 0.32 | 0.39 | ZDOCK no hit 2000 |
| 1OFU | L | 41 | 0  | 9  | 0.00 | 0.22 | Others            |
| 1OFU | R | 28 | 0  | 5  | 0.00 | 0.18 | Others            |
| 1OPH | L | 41 | 10 | 15 | 0.24 | 0.37 | ZDOCK no hit 2000 |
| 1OPH | R | 26 | 8  | 10 | 0.31 | 0.38 | ZDOCK no hit 2000 |

|      |   |    |    |    |      |      |                   |
|------|---|----|----|----|------|------|-------------------|
| 1OYV | L | 36 | 27 | 14 | 0.75 | 0.39 | ZDOCK 1st hit     |
| 1OYV | R | 47 | 38 | 19 | 0.81 | 0.40 | ZDOCK 1st hit     |
| 1PPE | L | 19 | 16 | 14 | 0.84 | 0.74 | ZDOCK 1st hit     |
| 1PPE | R | 45 | 24 | 22 | 0.53 | 0.49 | ZDOCK 1st hit     |
| 1PVH | L | 47 | 14 | 6  | 0.30 | 0.13 | Others            |
| 1PVH | R | 50 | 1  | 16 | 0.02 | 0.32 | Others            |
| 1PXV | R | 55 | 53 | 43 | 0.96 | 0.78 | ZDOCK no hit 2000 |
| 1QA9 | L | 31 | 0  | 0  | 0.00 | 0.00 | ZDOCK no hit 2000 |
| 1QA9 | R | 37 | 1  | 1  | 0.03 | 0.03 | ZDOCK no hit 2000 |
| 1R0R | L | 32 | 12 | 8  | 0.38 | 0.25 | Others            |
| 1R0R | R | 31 | 1  | 7  | 0.03 | 0.23 | Others            |
| 1R6Q | L | 41 | 12 | 14 | 0.29 | 0.34 | Others            |
| 1R6Q | R | 39 | 25 | 13 | 0.64 | 0.33 | Others            |
| 1R8S | L | 47 | 31 | 29 | 0.66 | 0.62 | ZDOCK no hit 2000 |
| 1R8S | R | 40 | 7  | 11 | 0.18 | 0.28 | ZDOCK no hit 2000 |
| 1RLB | L | 35 | 17 | 16 | 0.49 | 0.46 | ZDOCK 1st hit     |
| 1RLB | R | 43 | 22 | 18 | 0.51 | 0.42 | ZDOCK 1st hit     |
| 1RV6 | L | 31 | 1  | 18 | 0.03 | 0.58 | Others            |
| 1RV6 | R | 33 | 21 | 14 | 0.64 | 0.42 | Others            |
| 1S1Q | L | 30 | 19 | 23 | 0.63 | 0.77 | Others            |
| 1S1Q | R | 24 | 8  | 7  | 0.33 | 0.29 | Others            |
| 1SBB | L | 49 | 2  | 14 | 0.04 | 0.29 | Others            |
| 1SBB | R | 42 | 0  | 1  | 0.00 | 0.02 | Others            |
| 1SYX | L | 24 | 1  | 5  | 0.04 | 0.21 | ZDOCK no hit 2000 |
| 1SYX | R | 29 | 7  | 4  | 0.24 | 0.14 | ZDOCK no hit 2000 |
| 1T6B | L | 20 | 3  | 4  | 0.15 | 0.20 | Others            |
| 1T6B | R | 20 | 20 | 15 | 1.00 | 0.75 | Others            |
| 1TMQ | L | 44 | 27 | 13 | 0.61 | 0.30 | Others            |
| 1TMQ | R | 57 | 32 | 31 | 0.56 | 0.54 | Others            |
| 1UDI | R | 34 | 7  | 15 | 0.21 | 0.44 | Others            |
| 1US7 | L | 40 | 0  | 9  | 0.00 | 0.23 | Others            |
| 1US7 | R | 46 | 15 | 13 | 0.33 | 0.28 | Others            |
| 1WDW | L | 38 | 33 | 26 | 0.87 | 0.68 | Others            |
| 1WDW | R | 47 | 0  | 14 | 0.00 | 0.30 | Others            |
| 1WQ1 | L | 40 | 17 | 27 | 0.43 | 0.68 | Others            |
| 1WQ1 | R | 50 | 30 | 24 | 0.60 | 0.48 | Others            |
| 1XD3 | L | 31 | 23 | 21 | 0.74 | 0.68 | Others            |
| 1XD3 | R | 29 | 28 | 22 | 0.97 | 0.76 | Others            |
| 1XQS | L | 30 | 30 | 18 | 1.00 | 0.60 | Others            |

|      |   |    |    |    |      |      |                   |
|------|---|----|----|----|------|------|-------------------|
| 1XQS | R | 35 | 35 | 28 | 1.00 | 0.80 | Others            |
| 1XU1 | L | 19 | 5  | 7  | 0.26 | 0.37 | Others            |
| 1XU1 | R | 26 | 3  | 2  | 0.12 | 0.08 | Others            |
| 1Y64 | L | 53 | 32 | 23 | 0.60 | 0.43 | ZDOCK no hit 2000 |
| 1Y64 | R | 42 | 21 | 10 | 0.50 | 0.24 | ZDOCK no hit 2000 |
| 1YVB | L | 25 | 14 | 13 | 0.56 | 0.52 | Others            |
| 1Z0K | L | 21 | 19 | 20 | 0.90 | 0.95 | Others            |
| 1Z0K | R | 24 | 23 | 20 | 0.96 | 0.83 | Others            |
| 1Z5Y | L | 26 | 20 | 18 | 0.77 | 0.69 | Others            |
| 1Z5Y | R | 30 | 26 | 17 | 0.87 | 0.57 | Others            |
| 1ZHH | L | 44 | 0  | 16 | 0.00 | 0.36 | ZDOCK no hit 2000 |
| 1ZHH | R | 31 | 0  | 4  | 0.00 | 0.13 | ZDOCK no hit 2000 |
| 1ZHI | L | 46 | 0  | 10 | 0.00 | 0.22 | Others            |
| 1ZHI | R | 39 | 0  | 5  | 0.00 | 0.13 | Others            |
| 1ZLI | L | 34 | 23 | 19 | 0.68 | 0.56 | ZDOCK no hit 2000 |
| 1ZLI | R | 53 | 14 | 10 | 0.26 | 0.19 | ZDOCK no hit 2000 |
| 1ZM4 | R | 72 | 25 | 16 | 0.35 | 0.22 | Others            |
| 2A5T | L | 29 | 8  | 5  | 0.28 | 0.17 | ZDOCK no hit 2000 |
| 2A5T | R | 38 | 23 | 7  | 0.61 | 0.18 | ZDOCK no hit 2000 |
| 2A9K | L | 42 | 15 | 10 | 0.36 | 0.24 | ZDOCK no hit 2000 |
| 2A9K | R | 37 | 10 | 18 | 0.27 | 0.49 | ZDOCK no hit 2000 |
| 2ABZ | R | 29 | 17 | 9  | 0.59 | 0.31 | Others            |
| 2AJF | L | 36 | 2  | 24 | 0.06 | 0.67 | ZDOCK no hit 2000 |
| 2AJF | R | 36 | 0  | 3  | 0.00 | 0.08 | ZDOCK no hit 2000 |
| 2AYO | L | 30 | 20 | 20 | 0.67 | 0.67 | Others            |
| 2AYO | R | 26 | 0  | 2  | 0.00 | 0.08 | Others            |
| 2B42 | L | 43 | 25 | 25 | 0.58 | 0.58 | Others            |
| 2B42 | R | 41 | 29 | 24 | 0.71 | 0.59 | Others            |
| 2B4J | L | 22 | 12 | 7  | 0.55 | 0.32 | ZDOCK no hit 2000 |
| 2B4J | R | 23 | 10 | 4  | 0.43 | 0.17 | ZDOCK no hit 2000 |
| 2BTF | L | 40 | 3  | 9  | 0.08 | 0.23 | Others            |
| 2BTF | R | 55 | 21 | 17 | 0.38 | 0.31 | Others            |
| 2COL | L | 33 | 6  | 7  | 0.18 | 0.21 | ZDOCK no hit 2000 |
| 2COL | R | 49 | 1  | 8  | 0.02 | 0.16 | ZDOCK no hit 2000 |
| 2CFH | L | 33 | 17 | 20 | 0.52 | 0.61 | Others            |
| 2CFH | R | 39 | 36 | 31 | 0.92 | 0.79 | Others            |
| 2FJU | L | 49 | 0  | 13 | 0.00 | 0.27 | Others            |
| 2FJU | R | 58 | 0  | 5  | 0.00 | 0.09 | Others            |
| 2G77 | L | 34 | 23 | 22 | 0.68 | 0.65 | Others            |

|      |   |    |    |    |      |      |                   |
|------|---|----|----|----|------|------|-------------------|
| 2G77 | R | 34 | 3  | 10 | 0.09 | 0.29 | Others            |
| 2H7V | L | 28 | 17 | 15 | 0.61 | 0.54 | Others            |
| 2HLE | L | 26 | 13 | 16 | 0.50 | 0.62 | Others            |
| 2HLE | R | 37 | 0  | 2  | 0.00 | 0.05 | Others            |
| 2HQS | L | 42 | 23 | 18 | 0.55 | 0.43 | Others            |
| 2HQS | R | 43 | 0  | 14 | 0.00 | 0.33 | Others            |
| 2HRK | L | 24 | 10 | 13 | 0.42 | 0.54 | Others            |
| 2HRK | R | 33 | 11 | 13 | 0.33 | 0.39 | Others            |
| 2I9B | L | 37 | 21 | 22 | 0.57 | 0.59 | ZDOCK no hit 2000 |
| 2I9B | R | 29 | 0  | 1  | 0.00 | 0.03 | ZDOCK no hit 2000 |
| 2IDO | L | 35 | 19 | 20 | 0.54 | 0.57 | ZDOCK no hit 2000 |
| 2IDO | R | 45 | 22 | 16 | 0.49 | 0.36 | ZDOCK no hit 2000 |
| 2J0T | L | 40 | 0  | 11 | 0.00 | 0.28 | ZDOCK no hit 2000 |
| 2J0T | R | 35 | 19 | 15 | 0.54 | 0.43 | ZDOCK no hit 2000 |
| 2J7P | L | 32 | 7  | 6  | 0.22 | 0.19 | ZDOCK no hit 2000 |
| 2J7P | R | 32 | 4  | 9  | 0.13 | 0.28 | ZDOCK no hit 2000 |
| 2MTA | L | 25 | 15 | 14 | 0.60 | 0.56 | Others            |
| 2MTA | R | 34 | 4  | 15 | 0.12 | 0.44 | Others            |
| 2NZ8 | L | 38 | 18 | 20 | 0.47 | 0.53 | Others            |
| 2NZ8 | R | 43 | 24 | 14 | 0.56 | 0.33 | Others            |
| 2O3B | L | 34 | 12 | 12 | 0.35 | 0.35 | ZDOCK no hit 2000 |
| 2O3B | R | 41 | 0  | 16 | 0.00 | 0.39 | ZDOCK no hit 2000 |
| 2O8V | L | 45 | 41 | 34 | 0.91 | 0.76 | Others            |
| 2O8V | R | 47 | 16 | 18 | 0.34 | 0.38 | Others            |
| 2O0B | L | 20 | 16 | 17 | 0.80 | 0.85 | ZDOCK no hit 2000 |
| 2O0B | R | 22 | 9  | 10 | 0.41 | 0.45 | ZDOCK no hit 2000 |
| 2O0R | L | 33 | 8  | 18 | 0.24 | 0.55 | ZDOCK no hit 2000 |
| 2O0R | R | 54 | 0  | 10 | 0.00 | 0.19 | ZDOCK no hit 2000 |
| 2OT3 | L | 27 | 11 | 13 | 0.41 | 0.48 | ZDOCK no hit 2000 |
| 2OT3 | R | 26 | 18 | 17 | 0.69 | 0.65 | ZDOCK no hit 2000 |
| 2OUL | L | 34 | 29 | 22 | 0.85 | 0.65 | ZDOCK 1st hit     |
| 2OUL | R | 46 | 40 | 22 | 0.87 | 0.48 | ZDOCK 1st hit     |
| 2OZA | L | 27 | 18 | 10 | 0.67 | 0.37 | ZDOCK no hit 2000 |
| 2OZA | R | 31 | 12 | 14 | 0.39 | 0.45 | ZDOCK no hit 2000 |
| 2PCC | L | 32 | 10 | 12 | 0.31 | 0.38 | Others            |
| 2PCC | R | 30 | 11 | 11 | 0.37 | 0.37 | Others            |
| 2SIC | L | 34 | 16 | 15 | 0.47 | 0.44 | Others            |
| 2SIC | R | 44 | 23 | 16 | 0.52 | 0.36 | Others            |
| 2SNI | L | 32 | 16 | 17 | 0.50 | 0.53 | Others            |

|      |   |    |    |    |      |      |                   |
|------|---|----|----|----|------|------|-------------------|
| 2SNI | R | 50 | 14 | 15 | 0.28 | 0.30 | Others            |
| 2UUY | R | 40 | 17 | 20 | 0.43 | 0.50 | Others            |
| 2VDB | L | 20 | 4  | 13 | 0.20 | 0.65 | Others            |
| 2VDB | R | 38 | 0  | 5  | 0.00 | 0.13 | Others            |
| 2Z0E | L | 39 | 25 | 23 | 0.64 | 0.59 | ZDOCK no hit 2000 |
| 2Z0E | R | 49 | 1  | 5  | 0.02 | 0.10 | ZDOCK no hit 2000 |
| 3BP8 | L | 26 | 0  | 12 | 0.00 | 0.46 | Others            |
| 3BP8 | R | 39 | 0  | 0  | 0.00 | 0.00 | Others            |
| 3CPH | R | 36 | 10 | 11 | 0.28 | 0.31 | ZDOCK no hit 2000 |
| 3D5S | L | 19 | 9  | 7  | 0.47 | 0.37 | Others            |
| 3D5S | R | 23 | 3  | 0  | 0.13 | 0.00 | Others            |
| 3SGQ | L | 19 | 5  | 7  | 0.26 | 0.37 | Others            |
| 3SGQ | R | 25 | 0  | 10 | 0.00 | 0.40 | Others            |
| 4CPA | R | 40 | 26 | 11 | 0.65 | 0.28 | ZDOCK 1st hit     |
| 7CEI | L | 33 | 17 | 13 | 0.52 | 0.39 | ZDOCK 1st hit     |
| 7CEI | R | 30 | 18 | 14 | 0.60 | 0.47 | ZDOCK 1st hit     |

*a.* Total number of predicted interface residues with top-ranked ZDOCK prediction (ZDOCK1) and RCF was asked to make the same number of interface residues for comparison.

*b.* True Positives (TP) that are correctly predicted as interface residues with the given method.

*c.* ZDOCK performance classification for the given test case. Test cases are classified as “ZDOCK 1st hit” when the top-ranked ZDOCK prediction is a hit (interface RMSD  $\leq 2.5$  Å) and classified as “ZDOCK no hit 2000” when there is no hit within the top 2000 ZDOCK predictions. The remaining test cases, which have hits between rank 2 and 2000 but not at rank 1, are classified as “Others”.



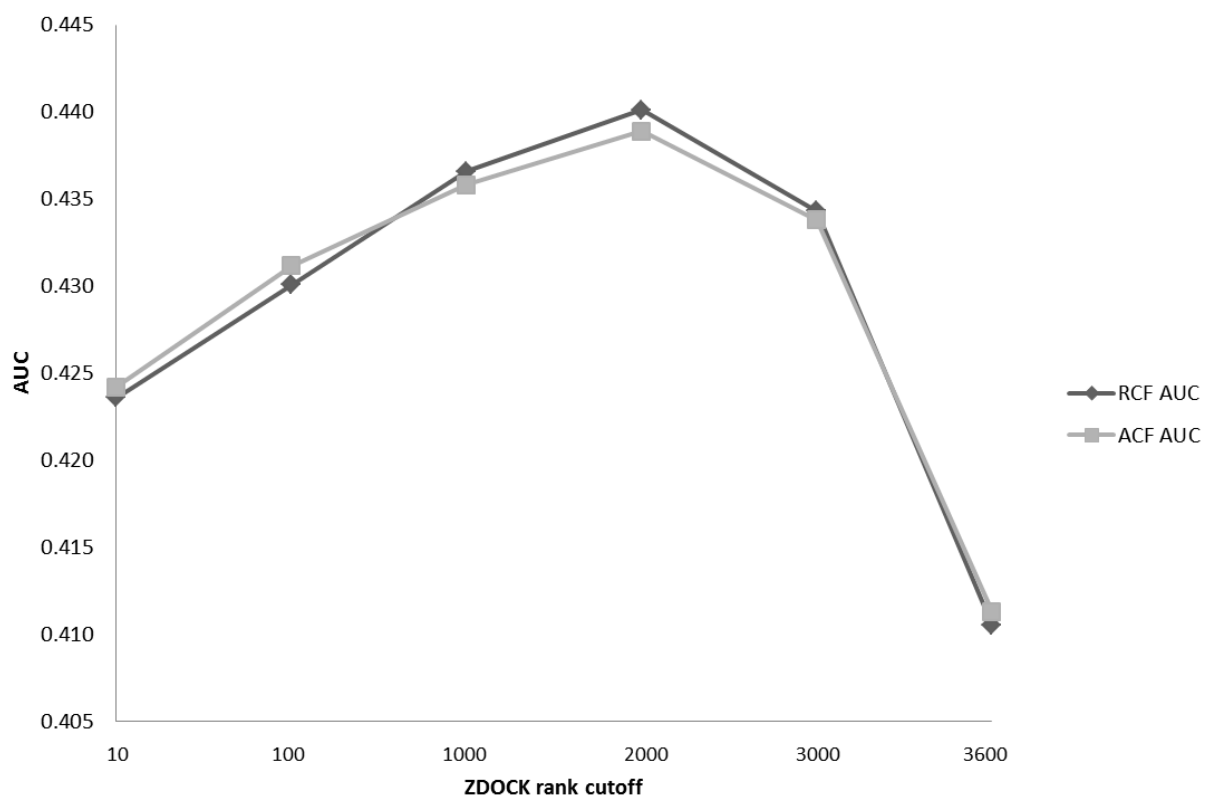

Figure S1. The Precision-Recall curve AUC for RCF and ACF at different rank cutoffs for ZDOCK prediction.

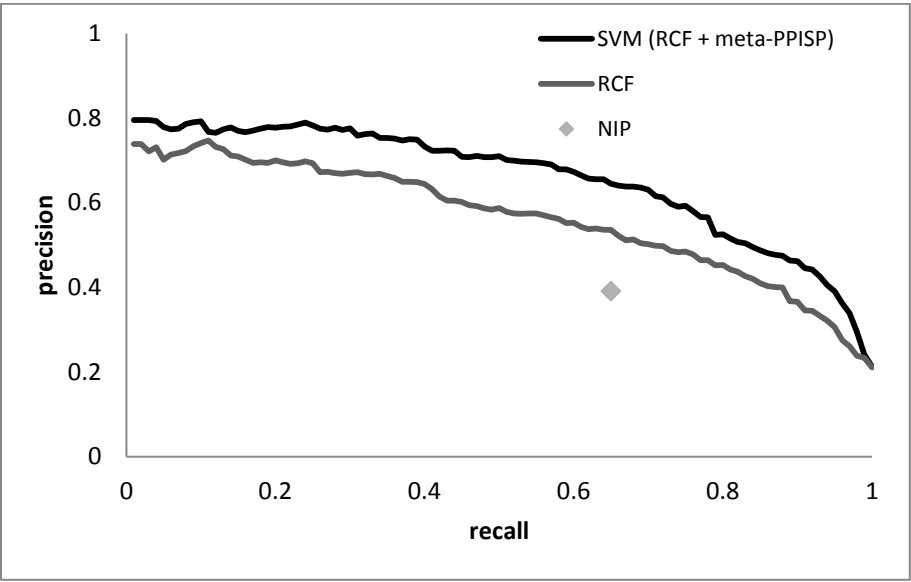

Figure S2. RCF and SVM Precision-Recall curve for the 12 cases (24 proteins) shared between this study and Fernandez-Recio et al.<sup>17</sup>, and the averaged precision and recall values for NIP.
